# Supplementary material
Source: publisher site journal article supplement (https://www.dovepress.com/article/455080)
Supplement: Supplementary file 1 [file get_supplementary_file.php]

**Supplementary table 1:** Unadjusted logistic regression analysis with patient education as the dependent variable.

|  | **OR (95% CI) Unadjusted** |
| --- | --- |
| Male  Female | Ref.  1.04 (1.00–1.09) |
| Age | **0.99 (0.99–0.99)** |
| BMI ≥22  BMI <22  Missing: BMI | Ref.  0.97 (0.91–1.03)  **0.16 (0.14–0.17)** |
| GOLD 1  GOLD 2  GOLD 3  GOLD 4  Missing: GOLD 1–4 | Ref.  **1.33 (1.22–1.45)**  **1.52 (1.37–1.68)**  **1.90 (1.59–2.27)**  **0.23 (0.21–0.25)** |
| GOLD A  GOLD B  GOLD E  Missing: GOLD A, B, E | Ref.  1.04 (0.98–1.11)  **1.17 (1.07–1.28)**  **0.11 (0.10–0.12)** |
| Never smoker  Ex-smoker  Current smoker  Missing: smoking status | Ref.  **2.43 (2.25–2.61)**  **1.80 (1.67–1.94)**  **0.20 (0.18–0.23)** |
| Primary school  Secondary school  Tertiary school  Missing: educational level | Ref.  **1.07 (1.02–1.13)**  0.99 (0.93–1.06)  **0.72 (0.58–0.88)** |
| Cardiovascular disease  Diabetes  Depression/anxiety | **0.81 (0.77–0.85)**  **0.83 (0.79–0.88)**  **0.87 (0.83–0.92)** |

**Notes:** Significant associations are given in bold.
**Abbreviations:** BMI = body mass index; CI = confidence interval; GOLD = Global Initiative for Chronic Obstructive Lung Disease; OR = odds ratio.
